# Supplementary material
Source: PubMed Central journal article supplement (PMC6638377)
Supplement: MPP-17-1265-s003.pdf [file MPP-17-1265-s003.pdf]

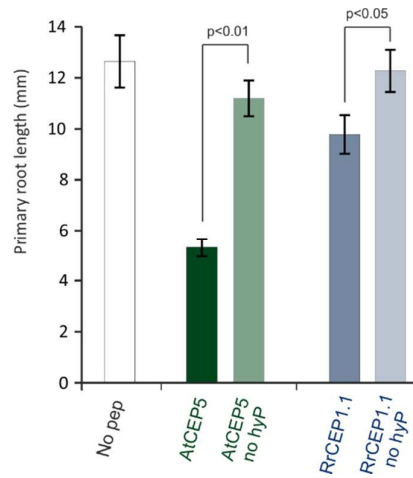

**Figure S3. Comparison of activity of RrCEP1.1 and AtCEP5 with and without hydroxyprolines.** Substituting canonical hydroxyprolines in positions 4 and 11 with proline markedly reduced the magnitude of host response for both AtCEP5 and RrCEP1.1 (Student's T-test, n=36-40, error bars indicate standard error of the mean).
